# Supplementary material for: Fabry disease in the haemodialysis population: outcome of a UK screening study (SoFAH)
Source: Springer Nature journal article supplement (doi:10.1186/s12882-025-04127-x), 2025-05-26
Supplement: MOESM1 [file 12882_2025_4127_MOESM1_ESM.pdf]

**SoFAH study Symptoms Questionnaire****IRAS number: 281233**

Study ID number:

Required help with completion? (please circle): Yes / No

Date completed :

|                                                                           | <b>Yes</b> | <b>No</b> |
|---------------------------------------------------------------------------|------------|-----------|
| Q1: Do you have episodes of burning pain in hands or feet?                |            |           |
| Q2: Do you sweat?                                                         |            |           |
| Q3: Do you find heat unbearable?                                          |            |           |
| Q4: Do you have abdominal pain, nausea, and or diarrhoea without a cause? |            |           |
| Q5: Do have you small red/purple spots on skin?                           |            |           |
| Q6: Do any of your family members have kidney disease?                    |            |           |
| Q7: Do any of your family members have heart disease or stroke?           |            |           |
